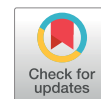

# Erratum

**Erratum. Gestational Diabetes Mellitus Can Be Prevented by Lifestyle Intervention: The Finnish Gestational Diabetes Prevention Study (RADIEL). A Randomized Controlled Trial. Diabetes Care 2016;39:24–30**

<https://doi.org/10.2337/dc17-er08a>

In the above-mentioned article, the sentence, “In addition, participants with GDM before 20 weeks of gestation were excluded from this study” was added to the end of the second paragraph in the RESEARCH DESIGN AND METHODS section and “or GDM diagnosed before 20 weeks of gestation” was deleted from the following sentence: “Exclusion criteria were type 1 or type 2 diabetes, or GDM diagnosed before 20 weeks of gestation; use of medication that influences glucose metabolism, such as continuous therapy with oral corticosteroids or metformin; multiple pregnancy; physical disability; current substance abuse; severe psychiatric disorder; and significant difficulty in cooperating (e.g., inadequate Finnish language skills).”

The online version of this article has been corrected to reflect these changes.

*Saila B. Koivusalo, Kristiina Rönö, Miira M. Klemetti, Risto P. Roine, Jaana Lindström, Majjaliisa Erkkola, Risto J. Kaaja, Maritta Pöyhönen-Alho, Aila Tiitinen, Emilia Huvinen, Sture Andersson, Hannele Laivuori, Anita Valkama, Jelena Meinilä, Hannu Kautiainen, Johan G. Eriksson, and Beata Stach-Lempinen*
